# Supplementary material
Source: ML conference proceedings conference paper supplement (https://proceedings.mlr.press/v32/wangd14.html)
Supplement: Supplementary file 2 [file wangd14-supp.zip]

Archive with 1 entries (1 files):
- SVM_Screening_ICML2014_Supplement.pdf
